# Supplementary material for: Phosphorus-modified Fe4N@N,P co-doped graphene as an efficient sulfur host for high-performance lithium–sulfur batteries
Source: Royal Society of Chemistry journal article supplement (doi:10.1039/d0ta12361g), 2021-01-01
Supplement: d0ta12361g1.pdf [file d0ta12361g1.pdf]

## Supporting Information

### **Phosphorus-Modified Fe<sub>4</sub>N@N, P Co-doped Graphene as Efficient Sulfur Host for High-Performance Lithium-Sulfur Batteries**

Meng Zhang,<sup>a</sup> Lu Wang,<sup>a</sup> Bin Wang,<sup>a</sup> Bo Zhang,<sup>a</sup> Xiuping Sun,<sup>a</sup> Debao Wang,<sup>b</sup> Zhen Kong,<sup>a</sup> Liqiang Xu\*<sup>a,c</sup>

<sup>a</sup> Key Laboratory of Colloid and Interface Chemistry, Ministry of Education, School of Chemistry and Chemical Engineering, Shandong University, Jinan 250100, P. R. China.

<sup>b</sup> College of Chemistry and Molecular Engineering, Qingdao University of Science and Technology, Qingdao 266042, China

<sup>c</sup> Shandong Provincial Key Laboratory/Collaborative Innovation Center of Chemical Energy Storage & Novel Cell Technology, Liaocheng University, Liaocheng City 252059, China

\*Corresponding author.

E-mail: [xulq@sdu.edu](mailto:xulq@sdu.edu)

## Content

### Figure captions:

- Fig. S1.** TEM and FESEM images of the obtained  $\text{Fe}_2\text{O}_3@\text{rGO}$ .
- Fig. S2.** (a) TEM, (b) HRTEM and (c-d) FESEM images of the obtained  $\text{Fe}_4\text{N}@\text{NG}$ .
- Fig. S3.** TEM images of P- $\text{Fe}_4\text{N}@\text{NPG}$  after 1 hour sonication.
- Fig. S4.** (a, b) FESEM images and (c) The corresponding EDS elemental mapping images of the obtained P- $\text{Fe}_4\text{N}@\text{NPG}/\text{S}$  composite.
- Fig. S5.** (a) TEM and (b) FESEM images of NPG. (c) The corresponding EDS elemental mapping of NPG. (d) EDS spectrum and (e) percentage of elements of NPG.
- Fig. S6.** The typical XRD pattern of the obtained  $\text{Fe}_2\text{O}_3@\text{rGO}$ .
- Fig. S7.** TGA curves of (a)  $\text{Fe}_4\text{N}@\text{NG}/\text{S}$  and (b)  $\text{Fe}_2\text{O}_3@\text{rGO}/\text{S}$ .
- Fig. S8.** Pore size distribution curves of P- $\text{Fe}_4\text{N}@\text{NPG}$  and P- $\text{Fe}_4\text{N}@\text{NPG}/\text{S}$ .
- Fig. S9.** XPS spectrum of the Fe 2p in full spectrum of P- $\text{Fe}_4\text{N}@\text{NPG}$  after  $\text{Li}_2\text{S}_6$  adsorption.
- Fig. S10.** (a, b) Cycling performances of P- $\text{Fe}_4\text{N}@\text{NPG}/\text{S}$  cathode at 0.1 and 0.2 C, respectively. (c) Galvanostatic charge/discharge profiles of the P- $\text{Fe}_4\text{N}@\text{NPG}/\text{S}$  cathode under different current densities. (d) Galvanostatic charge/discharge profiles of P- $\text{Fe}_4\text{N}@\text{NPG}/\text{S}$  cathode at 1 C.
- Fig. S11.** (a) CV curves of P- $\text{Fe}_4\text{N}@\text{NPG}/\text{S}$ ,  $\text{Fe}_4\text{N}@\text{NG}/\text{S}$  and  $\text{Fe}_2\text{O}_3@\text{rGO}/\text{S}$  cathodes at scan rate of  $0.1 \text{ mV s}^{-1}$ . (b) The linear sweep voltammetry scanning curves. (c) Galvanostatic charge/discharge profiles of P- $\text{Fe}_4\text{N}@\text{NPG}/\text{S}$ ,  $\text{Fe}_4\text{N}@\text{NG}/\text{S}$  and  $\text{Fe}_2\text{O}_3@\text{rGO}/\text{S}$  cathodes at 0.5 C.
- Fig. S12.** The electrochemical performance of  $\text{Fe}_2\text{O}_3@\text{rGO}/\text{S}$  cathode. (a) CV curves of  $\text{Fe}_2\text{O}_3@\text{rGO}/\text{S}$  cathode at a scan rate of  $0.1 \text{ mV s}^{-1}$ . (b) Galvanostatic charge/discharge profiles and (c) Long-term cycling performance of  $\text{Fe}_2\text{O}_3@\text{rGO}/\text{S}$  cathode at 1 C.
- Fig. S13.** The electrochemical performance of  $\text{Fe}_4\text{N}@\text{NG}/\text{S}$  cathode. (a) CV curves of  $\text{Fe}_4\text{N}@\text{NG}/\text{S}$  cathode at a scan rate of  $0.1 \text{ mV s}^{-1}$ . (b) Galvanostatic charge/discharge profiles and (c) Long-term cycling performance of  $\text{Fe}_4\text{N}@\text{NG}/\text{S}$  cathode at 1 C.
- Fig. S14.** Long-term cycling performance of P- $\text{Fe}_4\text{N}@\text{NPG}/\text{S}$  cathode at 2 C.
- Fig. S15.** (a) CV curves of NPG/S cathode at a scan rate of  $0.1 \text{ mV s}^{-1}$ . (b) Cycling performance and coulombic efficiency of NPG/S cathode at 0.2 C. (c) The typical galvanostatic charge/discharge voltage profiles of P- $\text{Fe}_4\text{N}@\text{NPG}/\text{S}$  and NPG/S cathodes at 0.2 C.
- Fig. S16.** (a) The electrochemical impedance spectra (EIS) of P- $\text{Fe}_4\text{N}@\text{NPG}/\text{S}$ ,  $\text{Fe}_4\text{N}@\text{NG}/\text{S}$  and  $\text{Fe}_2\text{O}_3@\text{rGO}/\text{S}$  cathodes before cycling. (b) The relationship between the  $Z'$  square root of angular frequency ( $\omega^{-0.5}$ ).
- Fig. S17.** (a, b) Coulombic efficiency of P- $\text{Fe}_4\text{N}@\text{NPG}/\text{S}$  cathode of lean electrolyte at 0.2 C and 0.1 C, respectively.
- Fig. S18.** Density of states of P- $\text{Fe}_4\text{N}$ .
- Table S1.** The electrochemical performance of P- $\text{Fe}_4\text{N}@\text{NPG}/\text{S}$  in this work compared with other similar materials reported in lithium-sulfur batteries.

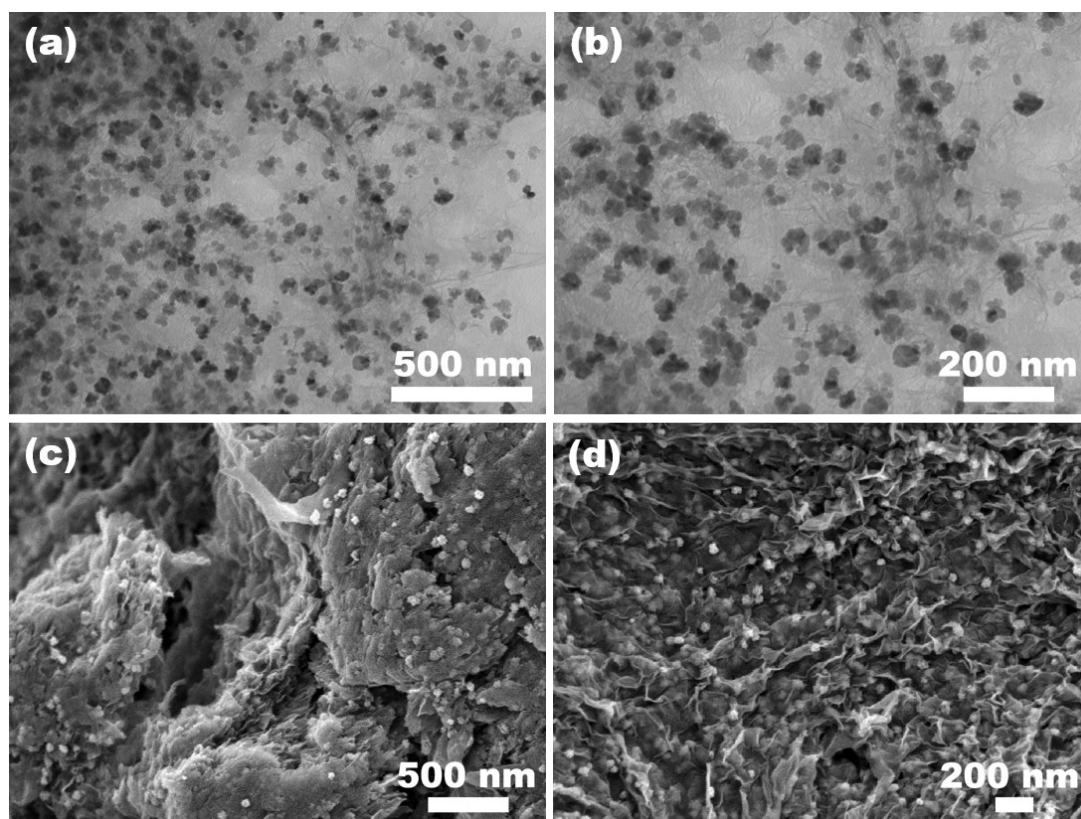

**Fig. S1.** TEM and FESEM images of the obtained  $\text{Fe}_2\text{O}_3@\text{rGO}$ .

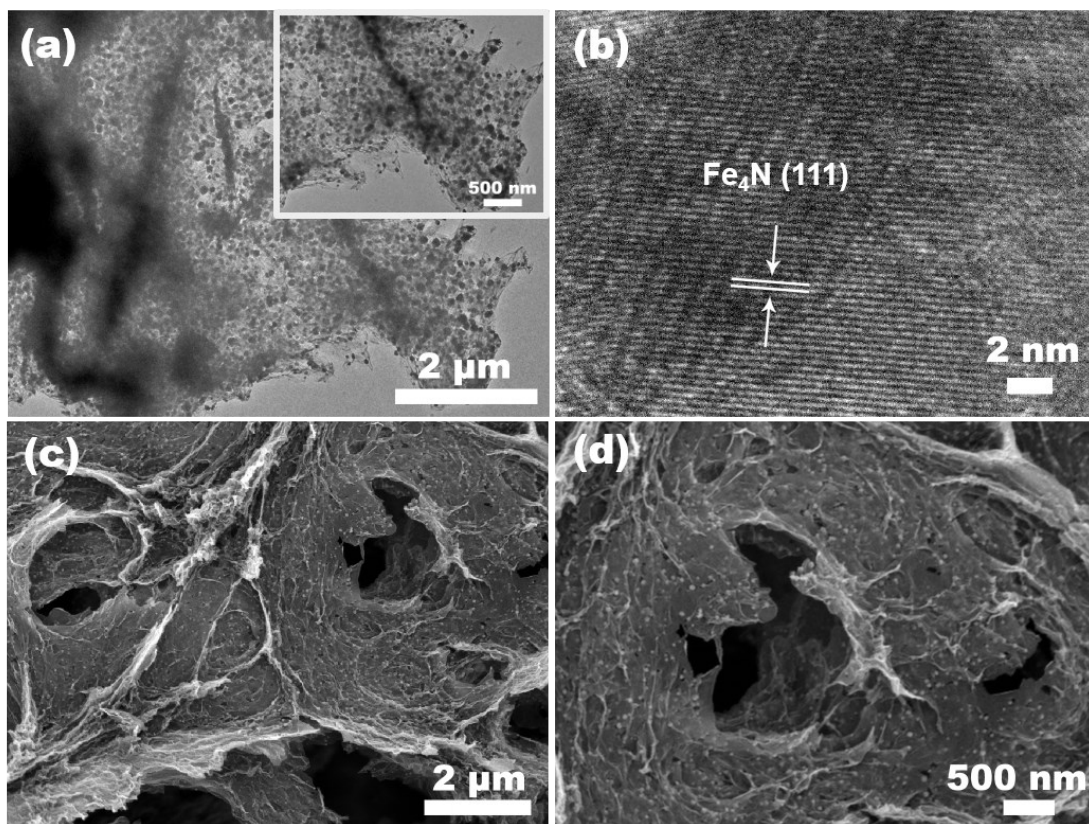

**Fig. S2.** (a)TEM, (b) HRTEM and (c-d) FESEM images of the obtained Fe<sub>4</sub>N@NG.

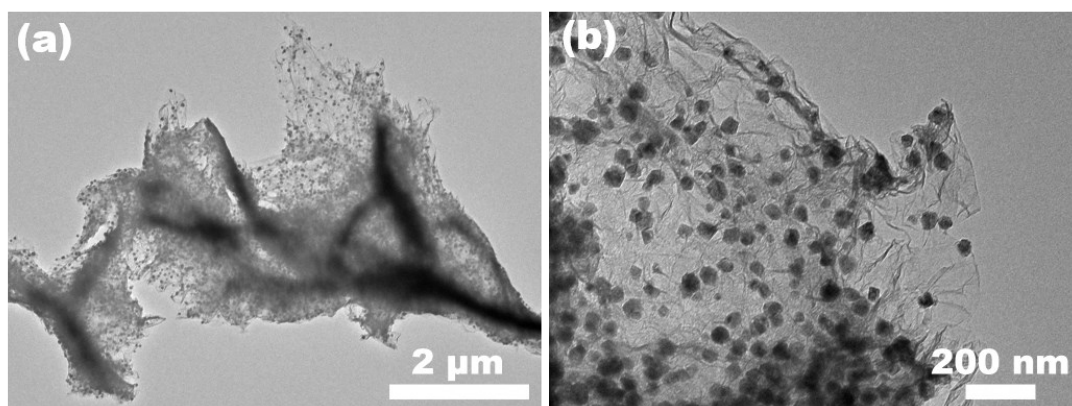

**Fig. S3.** TEM images of P-Fe<sub>4</sub>N@NPG after 1 hour sonication.

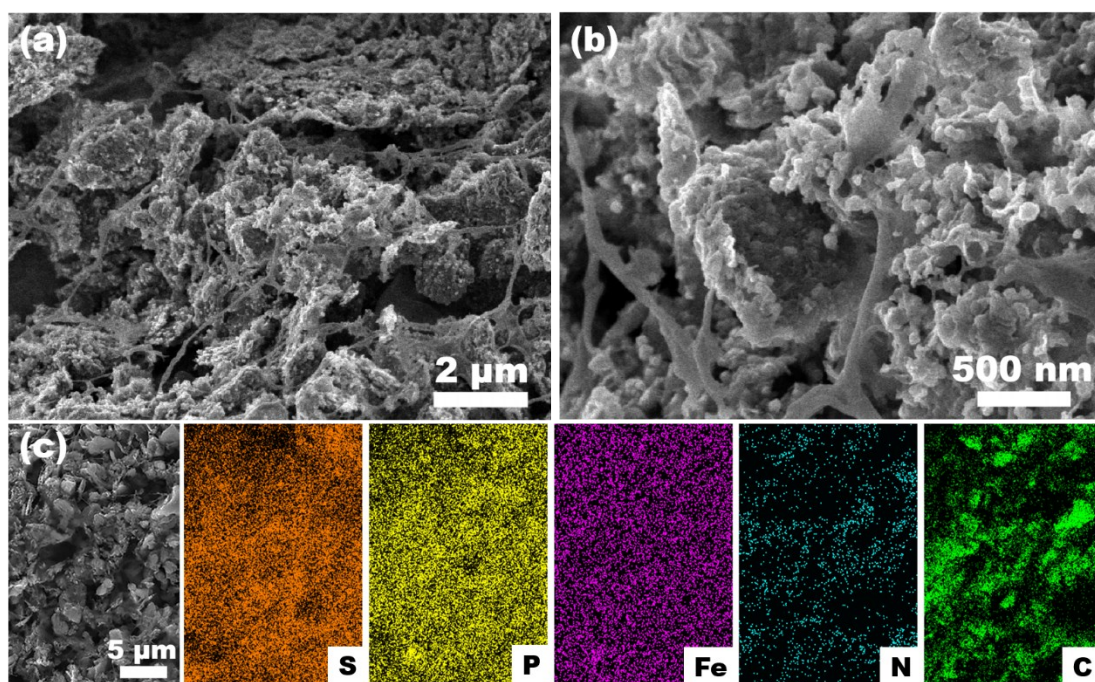

**Fig. S4.** (a, b) FESEM images and (c) The corresponding EDS elemental mapping images of the obtained P-Fe<sub>4</sub>N@NPG/S composite.

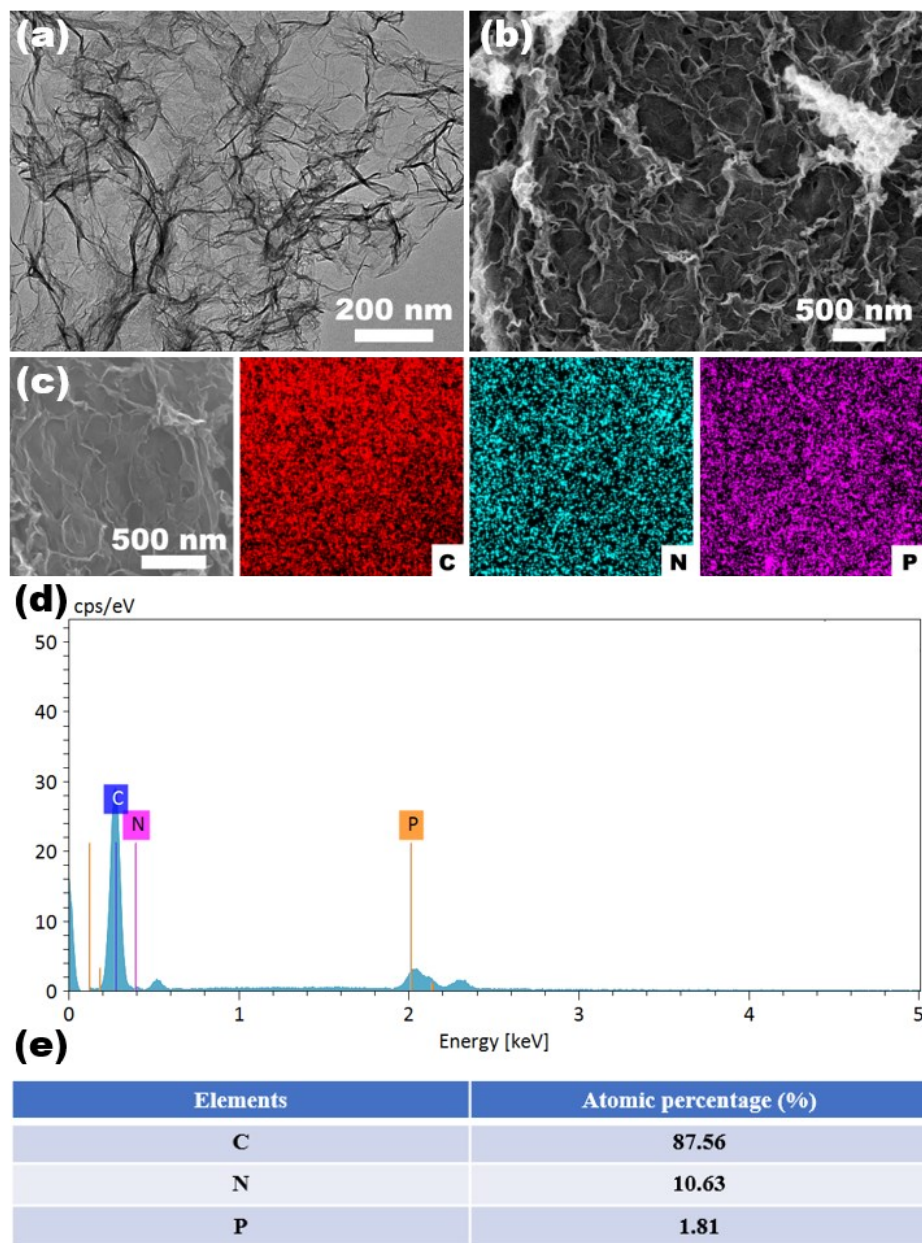

**Fig. S5.** (a) TEM and (b) FESEM images of NPG. (c) The corresponding EDS elemental mapping of NPG. (d) EDS spectrum and (e) percentage of elements of NPG.

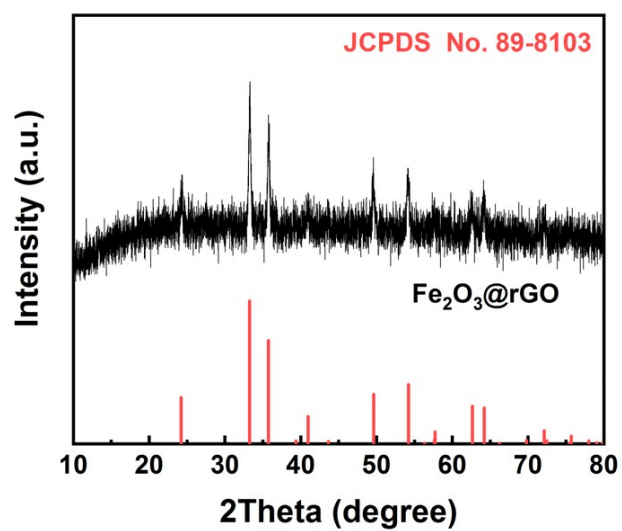

**Fig. S6.** The typical XRD pattern of the obtained Fe<sub>2</sub>O<sub>3</sub>@rGO.

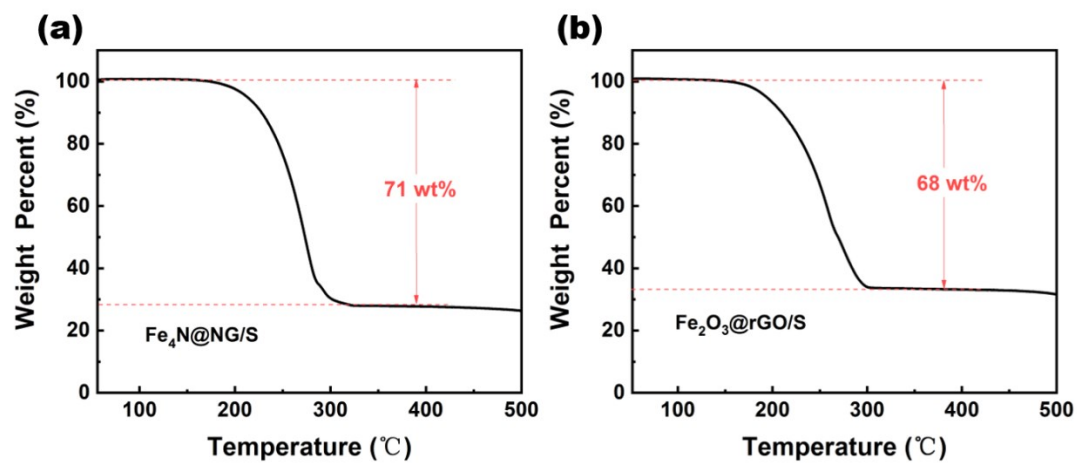

**Fig. S7.** TGA curves of (a)  $\text{Fe}_4\text{N@NG/S}$  and (b)  $\text{Fe}_2\text{O}_3@\text{rGO/S}$ .

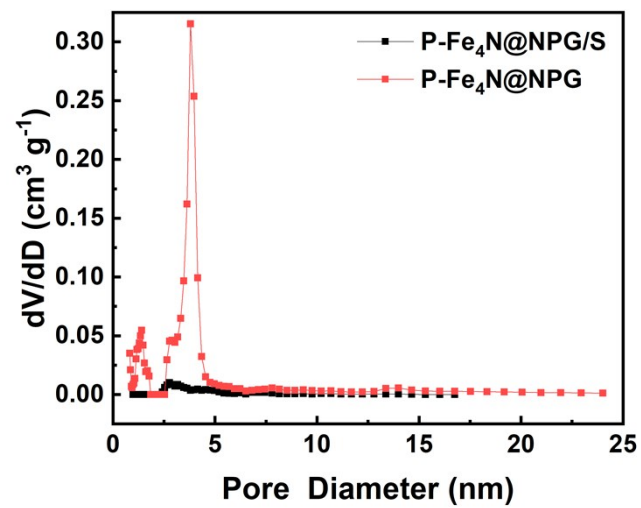

**Fig. S8.** Pore size distribution curves of P-Fe<sub>4</sub>N@NPG and P-Fe<sub>4</sub>N@NPG/S.

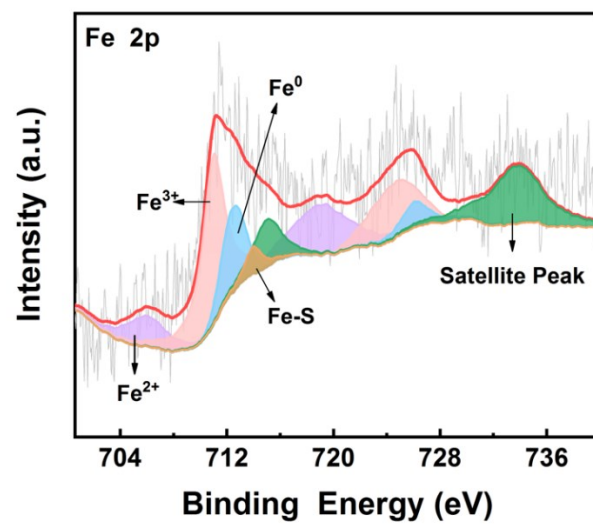

**Fig. S9.** XPS spectrum of the Fe 2p in full spectrum of P-Fe<sub>4</sub>N@NPG after Li<sub>2</sub>S<sub>6</sub> adsorption.

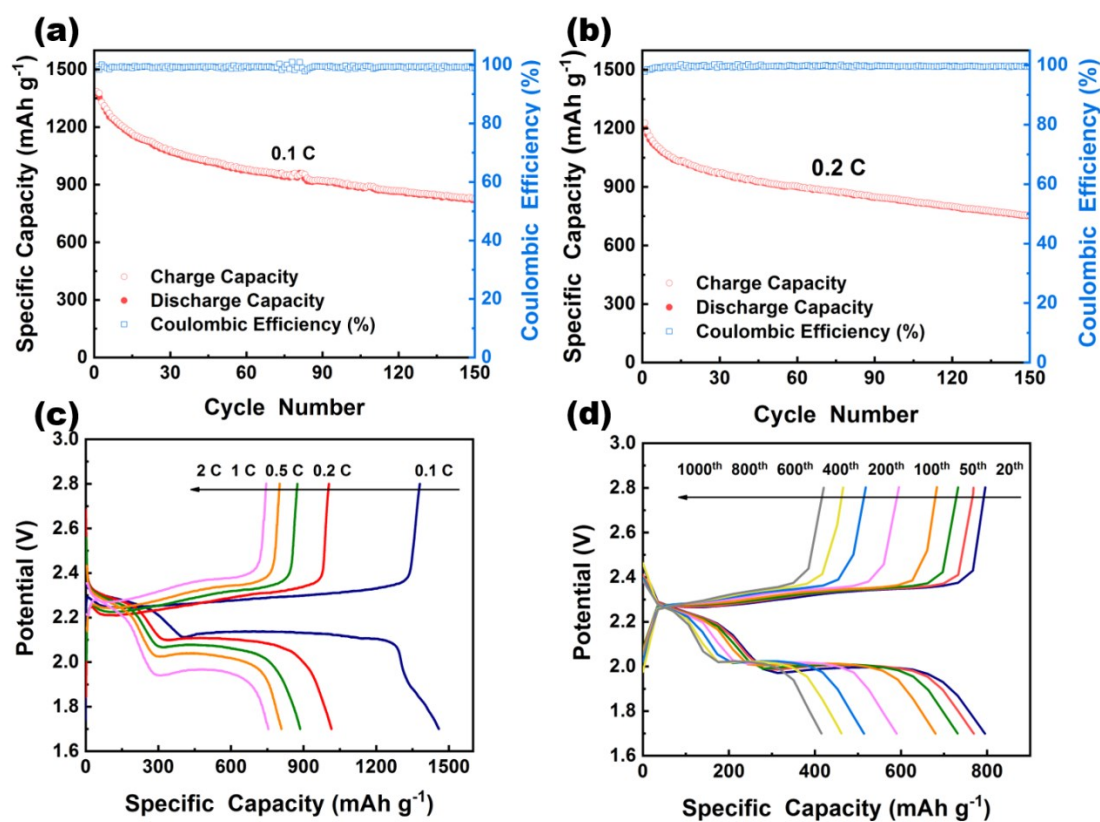

**Fig. S10.** (a, b) Cycling performances of P-Fe<sub>4</sub>N@NPG/S cathode at 0.1 and 0.2 C, respectively. (c) Galvanostatic charge/discharge profiles of the P-Fe<sub>4</sub>N@NPG/S cathode under different current densities. (d) Galvanostatic charge/discharge profiles of P-Fe<sub>4</sub>N@NPG/S cathode at 1 C.

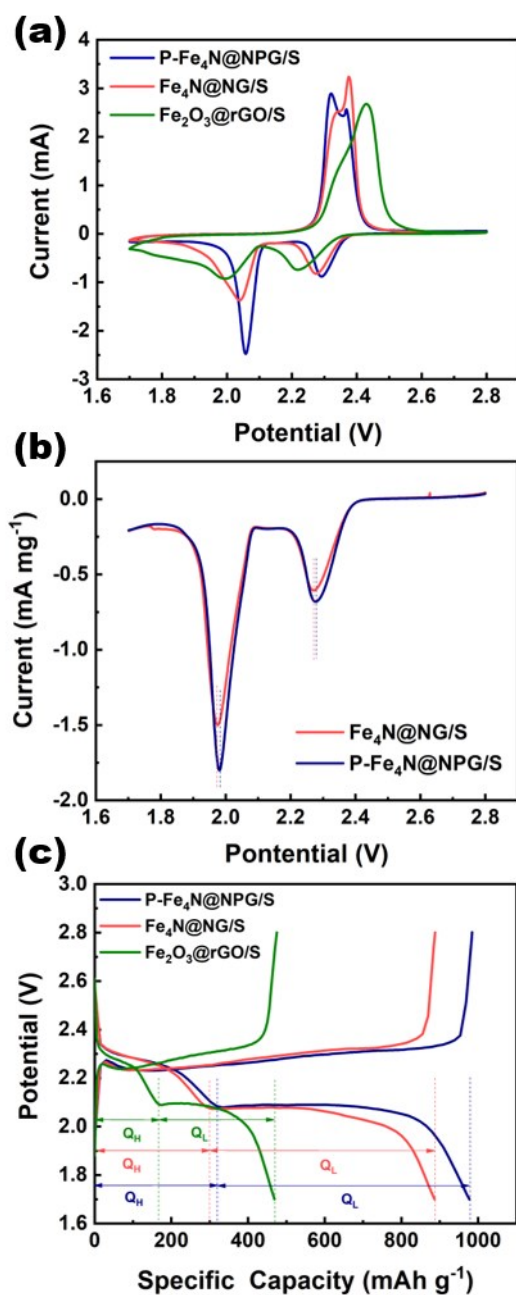

**Fig. S11.** (a) CV curves of P-Fe<sub>4</sub>N@NPG/S, Fe<sub>4</sub>N@NG/S and Fe<sub>2</sub>O<sub>3</sub>@rGO/S cathodes at scan rate of 0.1 mV s<sup>-1</sup>. (b) The linear sweep voltammetry scanning curves. (c) Galvanostatic charge/discharge profiles of P-Fe<sub>4</sub>N@NPG/S, Fe<sub>4</sub>N@NG/S and Fe<sub>2</sub>O<sub>3</sub>@rGO/S cathodes at 0.5 C.

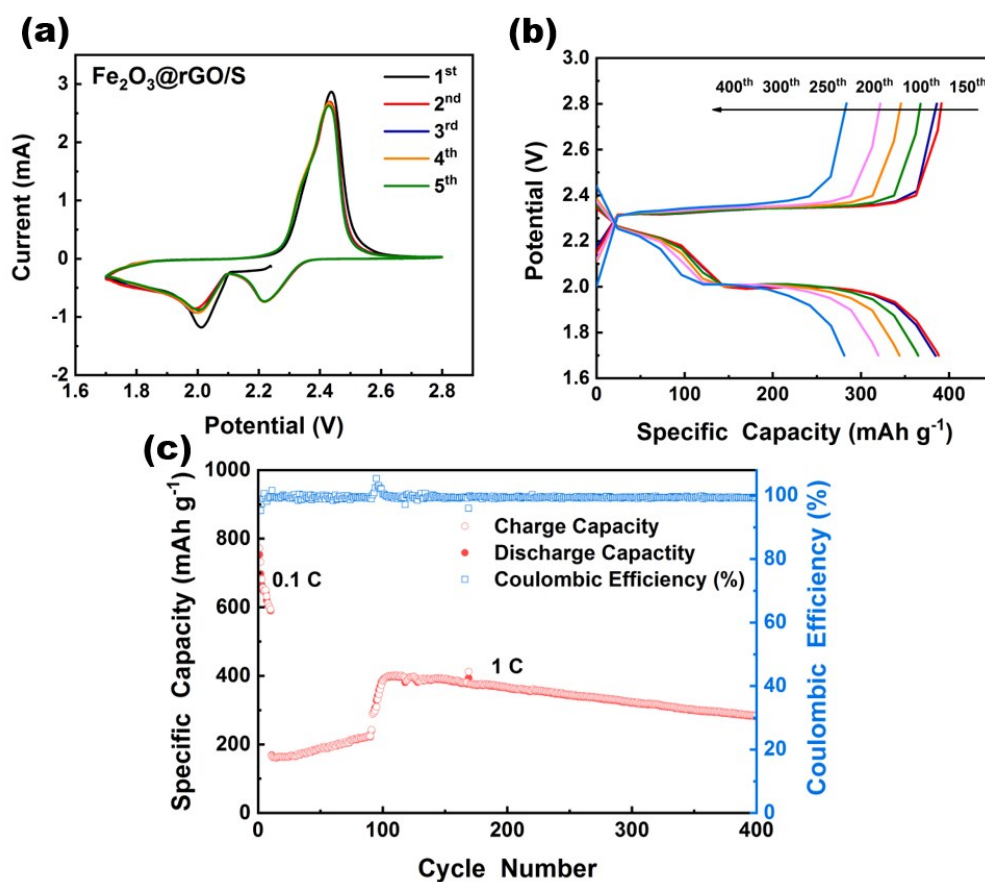

**Fig. S12.** The electrochemical performances of  $\text{Fe}_2\text{O}_3@\text{rGO}/\text{S}$  cathode. (a) CV curves of  $\text{Fe}_2\text{O}_3@\text{rGO}/\text{S}$  cathode at a scan rate of  $0.1 \text{ mV s}^{-1}$ . (b) Galvanostatic charge/discharge profiles and (c) Long-term cycling performance of  $\text{Fe}_2\text{O}_3@\text{rGO}/\text{S}$  cathode at 1 C.

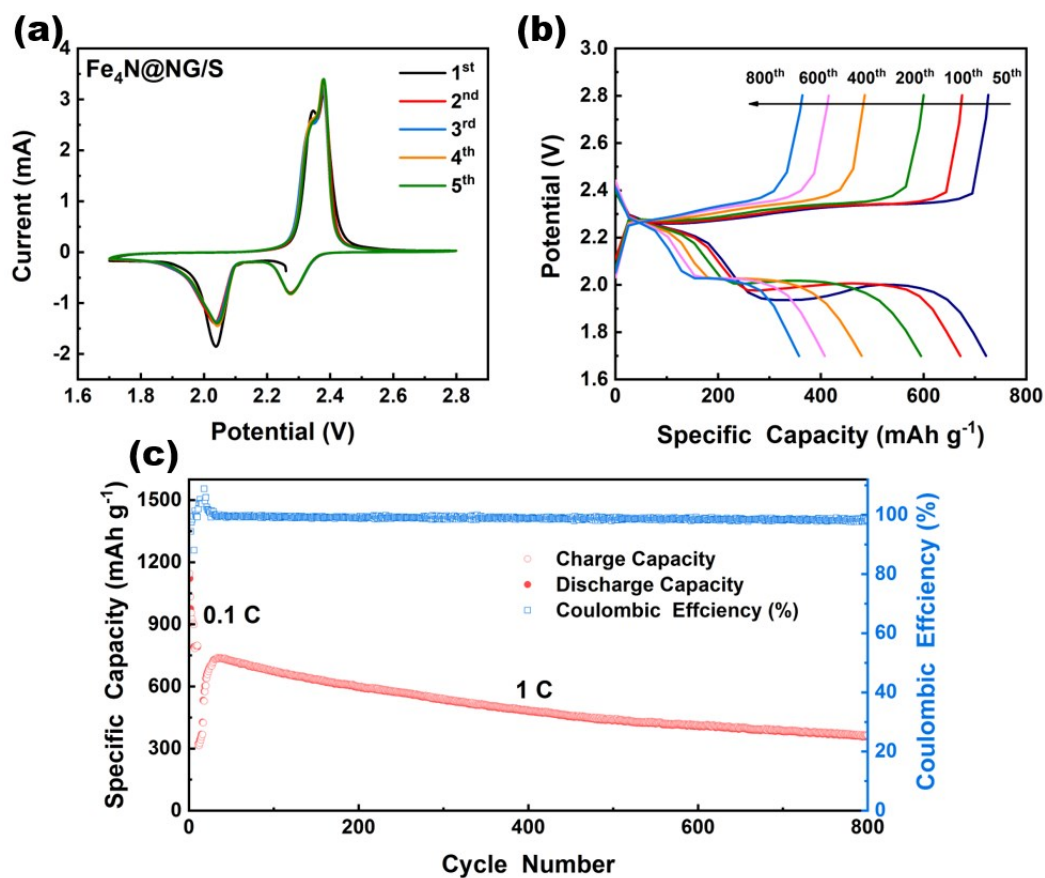

**Fig. S13.** The electrochemical performances of  $\text{Fe}_4\text{N@NG/S}$  cathode. (a) CV curves of  $\text{Fe}_4\text{N@NG/S}$  cathode at a scan rate of  $0.1 \text{ mV s}^{-1}$ . (b) Galvanostatic charge/discharge profiles and (c) Long-term cycling performance of  $\text{Fe}_4\text{N@NG/S}$  cathode at  $1 \text{ C}$ .

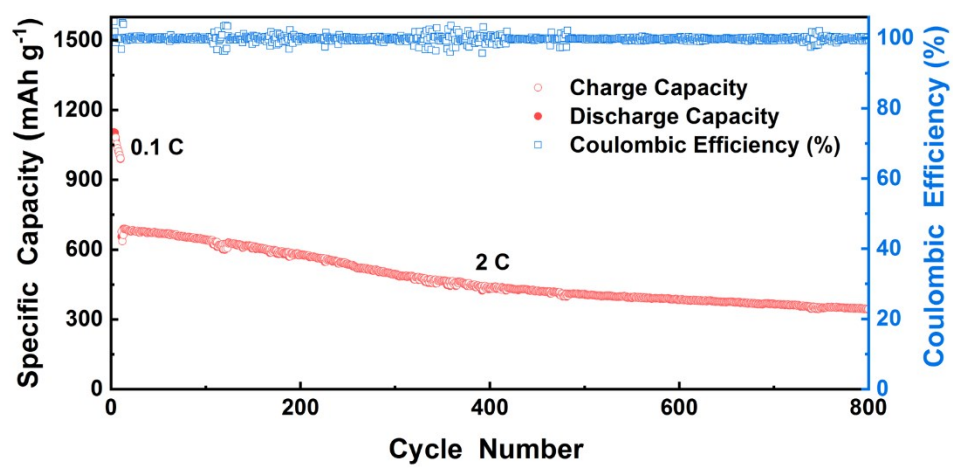

**Fig. S14.** Long-term cycling performance of P-Fe<sub>4</sub>N@NPG/S cathode at 2 C.

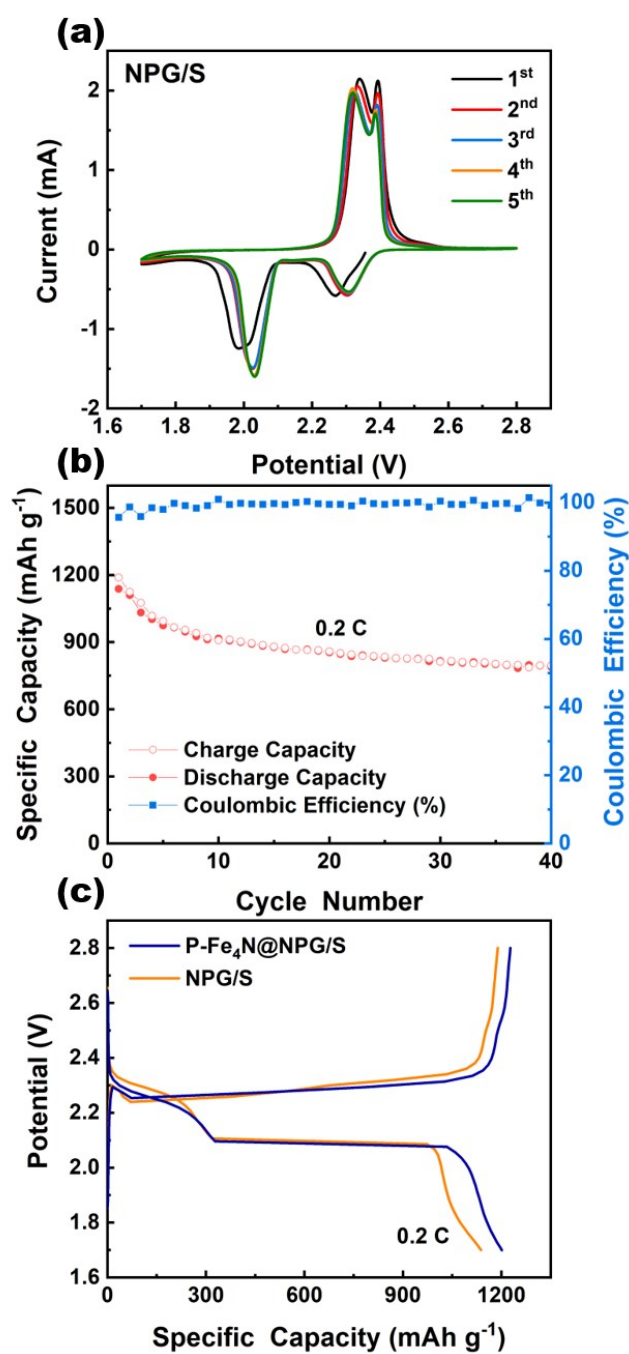

**Fig. S15.** (a) CV curves of NPG/S cathode at a scan rate of  $0.1 \text{ mV s}^{-1}$ . (b) Cycling performance and coulombic efficiency of NPG/S cathode at  $0.2 \text{ C}$ . (c) The typical galvanostatic charge/discharge voltage profiles of P- $\text{Fe}_4\text{N@NPG/S}$  and NPG/S cathodes at  $0.2 \text{ C}$ .

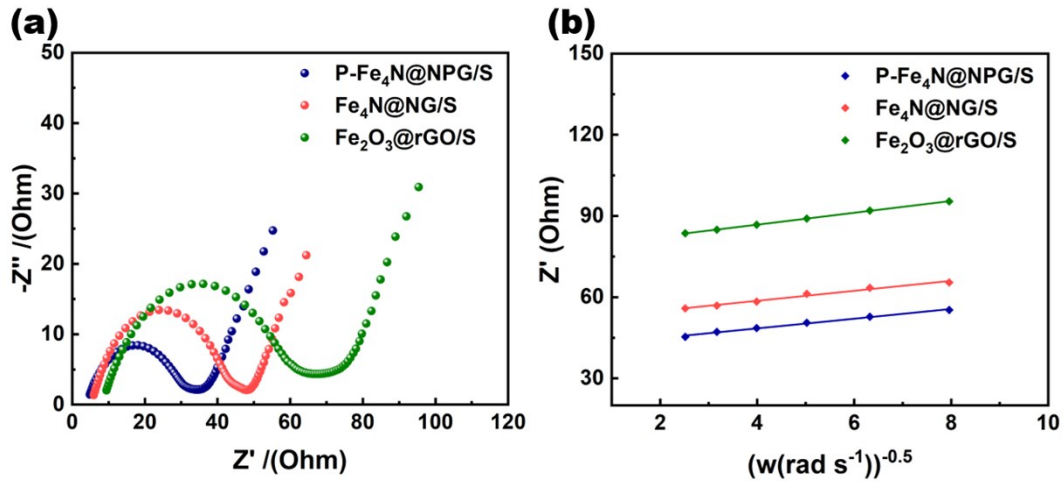

**Fig. S16.** (a) The electrochemical impedance spectra (EIS) of P-Fe<sub>4</sub>N@NPG/S, Fe<sub>4</sub>N@NG/S and Fe<sub>2</sub>O<sub>3</sub>@rGO/S cathodes before cycling. (b) The relationship between the  $Z'$  square root of angular frequency( $\omega^{-0.5}$ ).

To further explore the reasons for the excellent performance and high conductivity of P-Fe<sub>4</sub>N@NPG, we tested electrochemical impedance spectra (EIS) of P-Fe<sub>4</sub>N@NPG/S, Fe<sub>4</sub>N@NG/S and Fe<sub>2</sub>O<sub>3</sub>@rGO/S cathodes before cycling. The depressed semi-circle in the high-middle frequency region was attributed to the charge transfer resistance, and the slope part in the low frequency region was related with the ion diffusion process within the cathodes. The electrochemical impedance parameters were calculated according to the following equations (1-2).

$$Z_{re} = R_e + R_{ct} + \sigma \omega^{-0.5} \quad (1)$$

$$D_{Li^+} = 0.5(RT/AF^2C\sigma)^2 \quad (2)$$

In which the gas constant, angular frequency and the absolute temperature are expressed in terms of  $R$ ,  $\omega$  and  $T$ , while the electrode surface area, the Faraday constant, and molar concentration of  $Li^+$  are donated by  $A$ ,  $F$  and  $C$ , respectively.

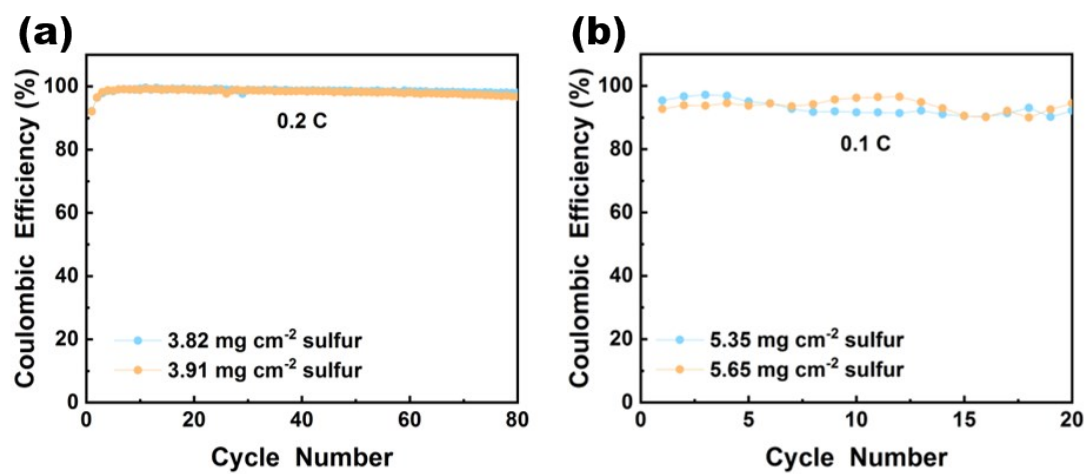

**Fig. S17.** (a, b) Coulombic efficiency of P-Fe<sub>4</sub>N@NPG/S cathode of lean electrolyte at 0.2 C and 0.1 C, respectively.

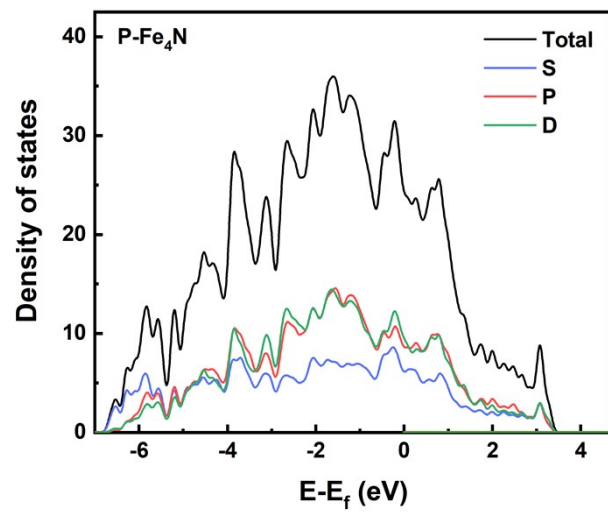

**Fig. S18.** Density of states of P-Fe<sub>4</sub>N.

**Table S1.** The electrochemical performance of the obtained P-Fe<sub>4</sub>N@NPG/S in this work compared with other similar materials reported in lithium-sulfur batteries.

| Materials                              | Sulfur Content | Areal Mass of Cathode (mg cm <sup>-2</sup> ) | Current Rate | Cycle Number | Electrochemical Performance (mAh g <sup>-1</sup> ) | Reference |
|----------------------------------------|----------------|----------------------------------------------|--------------|--------------|----------------------------------------------------|-----------|
| TiN                                    | 58.8%          | 1.0                                          | 0.5 C        | 500          | 644                                                | [1]       |
| TiN                                    | 70%            | 1.4-1.7                                      | 1 C          | 300          | 505.2                                              | [2]       |
| MoN-VN                                 | 58.5%          | 1.13                                         | 1 C          | 500          | 555                                                | [3]       |
| WN                                     | 59%            | 0.92                                         | 2 C          | 500          | 358                                                | [4]       |
| Fe <sub>3</sub> O <sub>4</sub> -NC@ACC | 54%            | 4.7                                          | 0.2 C        | 1000         | 760                                                | [5]       |
| CF/FeP@C                               |                | 1.56                                         | 1 C          | 200          | 500                                                | [6]       |
| FeP/rGO/CNTs                           | 75%            | 1.0                                          | 1 C          | 400          | 673                                                | [7]       |
| Fe-PNC/S                               | 70%            | 1.3                                          | 0.5 C        | 300          | 557.4                                              | [8]       |
| N,S-Codoped Graphene                   | 3.9 at. %      | 1.8-2.8                                      | 0.2 C        | 100          | 822                                                | [9]       |
| NPHPC                                  | 73%            | 0.88-1.59                                    | 1 C          | 200          | 575.1                                              | [10]      |
| P-Fe <sub>4</sub> N@NPG                | 73%            | 1.1-1.4                                      | 1 C          | 1000         | 417.4                                              | This Work |

## REFERENCE

- 1 Z. Cui, C. Zu, W. Zhou, A. Manthiram and J. B. Goodenough, *Adv. Mater.*, 2016, **28**, 6926-6931.
- 2 C. Li, J. Shi, L. Zhu, Y. Zhao, J. Lu and L. Xu, *Nano Res.*, 2018, **11**, 4302-4312.
- 3 C. Ye, Y. Jiao, H. Jin, A. D. Slattery, K. Davey, H. Wang, S-Z. Qiao, *Angew. Chem. Int. Ed.* 2018, **57**, 16703 –16707.
- 4 Z. D. Huang, Y. Fang, M. Yang, J. Yang, Y. Wang, Z. Wu, Q. Du, T. Masese, R. Liu, X. Yang, C. Qian, S. Jin and Y. Ma, *ACS Appl. Mater. Interfaces*, 2019, **11**, 20013-20021.
- 5 K. Lu, H. Zhang, S. Gao, H. Ma, J. Chen, Y. Cheng, *Adv. Funct. Mater.* 2019, **29**, 1807309.
- 6 J. Shen, X. Xu, J. Liu, Z. Liu, F. Li, R. Hu, J. Liu, X. Hou, Y. Feng, Y. Yu and M. Zhu, *ACS Nano*, 2019, **13**, 8986-8996.
- 7 S. Huang, Y. V. Lim, X. Zhang, Y. Wang, Y. Zheng, D. Kong, M. Ding, S. A. Yang and H. Y. Yang, *Nano Energy*, 2018, **51**, 340-348.
- 8 Z. Liu, L. Zhou, Q. Ge, R. Chen, M. Ni, W. Utetiwabo, X. Zhang and W. Yang, *ACS Appl. Mater.*

*Interfaces*, 2018, **10**, 19311-19317.

9 G. Zhou, E. Paek, G. S. Hwang and A. Manthiram, *Nat. Commun.*, 2015, **6**, 7760.

10 W. Ai, W. Zhou, Z. Du, Y. Chen, Z. Sun, C. Wu, C. Zou, C. Li, W. Huang and T. Yu, *Energy Storage Mater.*, 2017, **6**, 112-118.
